# Supplementary material for: Circulating Tumor Necrosis Factor α Receptors Predict the Outcomes of Human IgA Nephropathy: A Prospective Cohort Study
Source: PubMed Central journal article supplement (PMC4503615; doi:10.1371/journal.pone.0132826), 2015-07-15
Supplement: pone.0132826.s001.pdf [file pone.0132826.s001.pdf]

**S1 Table. Clinical variables classified according to the administration of renin-angiotensin system (RAS) blockers**

|                                           | <b>RAS blockers (+)</b><br><b>(N = 255, 73.5%)</b> | <b>RAS blockers (-)</b><br><b>(N = 92, 26.5%)</b> | <b>Total</b><br><b>(N = 347)</b> | <b>P</b> |
|-------------------------------------------|----------------------------------------------------|---------------------------------------------------|----------------------------------|----------|
| <b>Age (years)</b>                        | 39 (31, 49)                                        | 30 (21, 43)                                       | 37 (29, 48)                      | <0.001   |
| <b>Male (n/%)</b>                         | 111/43.5%                                          | 37/40.2%                                          | 148/42.7%                        | 0.582    |
| <b>Smoker (n/%)</b>                       | 33/12.9%                                           | 6/6.5%                                            | 39/11.2%                         | 0.095    |
| <b>Diabetes mellitus (n/%)</b>            | 11/4.3%                                            | 2/2.2%                                            | 13/3.7%                          | 0.354    |
| <b>Body mass index (kg/m<sup>2</sup>)</b> | 23.1 (20.7, 24.9)                                  | 21.5 (19.6, 24.2)                                 | 22.6 (20.5, 24.8)                | <0.001   |
| <b>Systolic blood pressure (mmHg)</b>     | 126 (115, 140)                                     | 120 (110, 130)                                    | 124 (111, 140)                   | <0.001   |
| <b>Microscopic hematuria (n/%)</b>        | 228/89.4%                                          | 83/90.2%                                          | 311/89.6%                        | 0.828    |
| <b>UPCR (g/g)</b>                         | 1.06 (0.50, 2.28)                                  | 0.57 (0.21, 1.02)                                 | 0.91 (0.43, 1.97)                | <0.001   |
| <b>Serum creatinine (mg/dL)</b>           | 1.0 (0.8, 1.3)                                     | 0.9 (0.8, 1.1)                                    | 1.0 (0.8, 1.3)                   | 0.019    |
| <b>eGFR (mL/min/1.73 m<sup>2</sup>)</b>   | 70.4 (52.7, 88.1)                                  | 82.3 (60.0, 97.2)                                 | 74.2 (54.2, 90.8)                | 0.002    |
| <b>Serum albumin (mg/dL)</b>              | 4.0 (3.7, 4.3)                                     | 4.1 (3.7, 4.4)                                    | 4.0 (3.7, 4.3)                   | 0.155    |
| <b>Serum IgA (mg/dL)</b>                  | 291.0 (234.0, 365.5)                               | 273.0 (173.0, 341.0)                              | 283.0 (222.3, 358.5)             | 0.005    |
| <b>Uric acid (mg/dL)</b>                  | 5.8 (4.6, 7.1)                                     | 4.9 (4.2, 6.0)                                    | 5.5 (4.4, 6.9)                   | 0.002    |
| <b>Circulating TNFR1 (pg/mL)</b>          | 1148.5 (819.9, 1513.2)                             | 897.0 (597.3, 1339.8)                             | 1077.8 (746.8, 1470.9)           | 0.001    |
| <b>Circulating TNFR2 (pg/mL)</b>          | 2623.1 (1991.4, 3809.9)                            | 2080.4 (1710.9, 3114.6)                           | 2412.3 (1896.0, 3568.8)          | 0.002    |
| <b>Glomerular sclerosis</b>               |                                                    |                                                   |                                  | 0.360    |
| None                                      | 108/42.4%                                          | 42/45.7%                                          | 150/43.2%                        |          |
| Mild                                      | 103/40.4%                                          | 36/39.1%                                          | 139/40.1%                        |          |
| Moderate                                  | 23/9.0%                                            | 11/12.0%                                          | 34/9.8%                          |          |
| Severe                                    | 21/8.2%                                            | 3/3.3%                                            | 24/6.9%                          |          |
| <b>Mesangial hypercellularity</b>         |                                                    |                                                   |                                  | <0.001   |
| None                                      | 14/5.5%                                            | 18/19.6%                                          | 32/9.2%                          |          |
| Mild                                      | 154/60.4%                                          | 63/68.5%                                          | 217/62.5%                        |          |
| Moderate                                  | 41/16.1%                                           | 8/8.7%                                            | 49/14.1%                         |          |

|                                              |           |          |           |        |
|----------------------------------------------|-----------|----------|-----------|--------|
| Severe                                       | 46/18.0%  | 3/3.3%   | 49/14.1%  |        |
| <b>Interstitial fibrosis/tubular atrophy</b> |           |          |           | 0.124  |
| None                                         | 47/18.4%  | 21/22.8% | 68/19.6%  |        |
| Mild                                         | 155/60.8% | 62/67.4% | 217/62.5% |        |
| Moderate                                     | 43/16.9%  | 7/7.6%   | 50/14.4%  |        |
| Severe                                       | 10/3.9%   | 2/2.2%   | 12/3.5%   |        |
| <b>Crescent formation</b>                    |           |          |           | 0.646  |
| None                                         | 199/78.0% | 74/80.4% | 273/78.7% |        |
| Mild                                         | 49/19.2%  | 17/18.5% | 66/19.0%  |        |
| Moderate                                     | 7/2.7%    | 1/1.1%   | 8/2.3%    |        |
| <b>Medical treatment (n/%)</b>               |           |          |           |        |
| Statin                                       | 77/30.2%  | 4/4.3%   | 81/23.3%  | <0.001 |
| Immunosuppressant                            | 36/14.1%  | 7/7.6%   | 43/12.4%  | 0.104  |

Data are presented as a number (percent) or a median (25<sup>th</sup>, 75<sup>th</sup> percentiles).

eGFR, estimated glomerular filtration rate; TNFR, tumor necrosis factor receptor; UPCR, urine protein-creatinine ratio
