# Supplementary material for: Circulating Tumor Necrosis Factor α Receptors Predict the Outcomes of Human IgA Nephropathy: A Prospective Cohort Study
Source: PubMed Central journal article supplement (PMC4503615; doi:10.1371/journal.pone.0132826), 2015-07-15
Supplement: pone.0132826.s002.pdf [file pone.0132826.s002.pdf]

**S2 Table. Clinical variables classified according to the immunosuppressive (IS) treatment**

|                                           | <b>IS (+)</b><br><b>(N = 43, 12.4%)</b> | <b>IS (-)</b><br><b>(N = 304, 87.6%)</b> | <b>Total</b><br><b>(N = 347)</b> | <b>P</b> |
|-------------------------------------------|-----------------------------------------|------------------------------------------|----------------------------------|----------|
| <b>Age (years)</b>                        | 43 (30, 50)                             | 36 (28, 48)                              | 37 (29, 48)                      | 0.262    |
| <b>Male (n/%)</b>                         | 11/25.6%                                | 137/45.1%                                | 148/42.7%                        | 0.016    |
| <b>Smoker (n/%)</b>                       | 5/11.6%                                 | 34/11.2%                                 | 39/11.2%                         | 0.931    |
| <b>Diabetes mellitus (n/%)</b>            | 3/7.0%                                  | 10/3.3%                                  | 13/3.7%                          | 0.233    |
| <b>Body mass index (kg/m<sup>2</sup>)</b> | 22.9 (20.4, 24.7)                       | 22.6 (20.5, 24.9)                        | 22.6 (20.5, 24.8)                | 0.879    |
| <b>Systolic blood pressure (mmHg)</b>     | 122 (110, 140)                          | 124 (114, 140)                           | 124 (111, 140)                   | 0.624    |
| <b>Microscopic hematuria (n/%)</b>        | 38/88.4%                                | 273/89.8%                                | 311/89.6%                        | 0.773    |
| <b>UPCR (g/g)</b>                         | 2.85 (1.08, 4.33)                       | 0.79 (0.40, 1.64)                        | 0.91 (0.43, 1.97)                | <0.001   |
| <b>Serum creatinine (mg/dL)</b>           | 1.1 (0.9, 1.4)                          | 1.0 (0.8, 1.2)                           | 1.0 (0.8, 1.3)                   | 0.145    |
| <b>eGFR (mL/min/1.73m<sup>2</sup>)</b>    | 62.6 (48.1, 76.5)                       | 75.8 (56.0, 92.1)                        | 74.2 (54.2, 90.8)                | 0.005    |
| <b>Serum albumin (mg/dL)</b>              | 3.6 (3.1, 4.2)                          | 4.1 (3.7, 4.3)                           | 4.0 (3.7, 4.3)                   | <0.001   |
| <b>Serum IgA (mg/dL)</b>                  | 255.5 (220.0, 311.5)                    | 286.0 (223.3, 359.0)                     | 283.0 (222.3, 358.5)             | 0.299    |
| <b>Uric acid (mg/dL)</b>                  | 5.5 (4.4, 7.1)                          | 5.5 (4.4, 6.9)                           | 5.5 (4.4, 6.9)                   | 0.828    |
| <b>Circulating TNFR1 (pg/mL)</b>          | 1393.1 (1077.8, 2195.0)                 | 1026.2 (704.2, 1427.7)                   | 1077.8 (746.8, 1470.9)           | <0.001   |
| <b>Circulating TNFR2 (pg/mL)</b>          | 3563.7 (2297.3, 5259.8)                 | 2362.0 (1824.8, 3268.3)                  | 2412.3 (1896.0, 3568.8)          | <0.001   |
| <b>Glomerular sclerosis</b>               |                                         |                                          |                                  | 0.060    |
| None                                      | 18/41.9%                                | 132/43.4%                                | 150/43.2%                        |          |
| Mild                                      | 13/30.2%                                | 126/41.4%                                | 139/40.1%                        |          |
| Moderate                                  | 9/20.9%                                 | 25/8.2%                                  | 34/9.8%                          |          |
| Severe                                    | 3/7.0%                                  | 21/6.9%                                  | 24/6.9%                          |          |
| <b>Mesangial hypercellularity</b>         |                                         |                                          |                                  | 0.869    |
| None                                      | 5/11.6%                                 | 27/8.9%                                  | 32/9.2%                          |          |
| Mild                                      | 26/60.5%                                | 191/62.8%                                | 217/62.5%                        |          |
| Moderate                                  | 5/11.6%                                 | 44/14.5%                                 | 49/14.1%                         |          |
| Severe                                    | 7/16.3%                                 | 42/13.8%                                 | 49/14.1%                         |          |

|                                              |          |           |           |       |
|----------------------------------------------|----------|-----------|-----------|-------|
| <b>Interstitial fibrosis/tubular atrophy</b> |          |           |           | 0.774 |
| None                                         | 7/16.3%  | 61/20.1%  | 68/19.6%  |       |
| Mild                                         | 26/60.5% | 191/62.8% | 217/62.5% |       |
| Moderate                                     | 8/18.6%  | 42/13.8%  | 50/14.4%  |       |
| Severe                                       | 2/4.7%   | 10/3.3%   | 12/3.5%   |       |
| <b>Crescent formation</b>                    |          |           |           | 0.549 |
| None                                         | 33/76.7% | 240/78.9% | 273/78.7% |       |
| Mild                                         | 8/18.6%  | 58/19.1%  | 66/19.0%  |       |
| Moderate                                     | 2/4.7%   | 6/2.0%    | 8/2.3%    |       |
| <b>Medical treatment (n/%)</b>               |          |           |           |       |
| Statin                                       | 16/37.2% | 65/21.4%  | 81/23.3%  | 0.022 |
| RAS blocker                                  | 36/83.7% | 219/72.0% | 255/73.5% | 0.104 |

Data are presented as a number (percent) or a median (25<sup>th</sup>, 75<sup>th</sup> percentiles).

eGFR, estimated glomerular filtration rate; TNFR, tumor necrosis factor receptor; UPCR, urine protein-creatinine ratio
