# Supplementary material for: Circulating Tumor Necrosis Factor α Receptors Predict the Outcomes of Human IgA Nephropathy: A Prospective Cohort Study
Source: PubMed Central journal article supplement (PMC4503615; doi:10.1371/journal.pone.0132826), 2015-07-15
Supplement: pone.0132826.s003.pdf [file pone.0132826.s003.pdf]

**S3 Table. Predictability of circulating TNFRs on clinical outcome classified by the immunosuppressive (IS) treatment**

| IS (+)       |                         | Model 1 <sup>a</sup> |          | Model 2 <sup>b</sup> |          |
|--------------|-------------------------|----------------------|----------|----------------------|----------|
|              |                         | HR (95% CI)          | <i>P</i> | HR (95% CI)          | <i>P</i> |
| <b>TNFR1</b> | <b>Q1-3 (reference)</b> | 1.00                 |          | 1.00                 |          |
|              | <b>Q4</b>               | 9.14 (1.85-45.13)    | 0.007    | 8.74 (1.77-43.06)    | 0.008    |
| <b>TNFR2</b> | <b>Q1-3 (reference)</b> | 1.00                 |          | 1.00                 |          |
|              | <b>Q4</b>               | 7.06 (1.46-34.19)    | 0.015    | 6.75 (1.40-32.58)    | 0.017    |
| IS (-)       |                         | Model 1 <sup>a</sup> |          | Model 2 <sup>b</sup> |          |
|              |                         | HR (95% CI)          | <i>P</i> | HR (95% CI)          | <i>P</i> |
| <b>TNFR1</b> | <b>Q1-3 (reference)</b> | 1.00                 |          | 1.00                 |          |
|              | <b>Q4</b>               | 13.47 (6.09-29.81)   | <0.001   | 9.74 (4.16-22.78)    | <0.001   |
| <b>TNFR2</b> | <b>Q1-3 (reference)</b> | 1.00                 |          | 1.00                 |          |
|              | <b>Q4</b>               | 5.78 (2.82-11.84)    | <0.001   | 3.79 (1.72-8.33)     | 0.001    |

<sup>a</sup> Unadjusted model

<sup>b</sup> Model 1 + adjustment for gender, age, systolic blood pressure, eGFR, urine protein-creatinine ratio, and the quartiles of concentrations of cTNFRs

TNFR, tumor necrosis factor receptor
